# Supplementary material for: Hydrogen solution in high-entropy alloys
Source: Royal Society of Chemistry journal article supplement (doi:10.1039/d1cp04151g), 2021-01-01
Supplement: d1cp04151g1.pdf [file d1cp04151g1.pdf]

## Hydrogen solution in high-entropy alloys

X. L. Ren<sup>1,4</sup>, P. H. Shi<sup>1</sup>, B. D. Yao<sup>2</sup>, L. Wu<sup>3</sup>, X.Y. Wu<sup>3</sup>, Y. X. Wang<sup>1\*</sup>

1. Key Laboratory of Nuclear Physics and Ion-beam Application (MOE), Institute of Modern Physics, Department of Nuclear Science and Technology, Fudan University, Shanghai, 200433, China

2. Shandong Peninsula Engineering Research Center of Comprehensive Brine Utilization, Weifang University of Science and Technology, Shouguang 262700, Shandong, China

3. The First Sub-Institute, Nuclear Power Institute of China, Chengdu, 610005, China

4. College of Material and Metallurgy, Guizhou University, Guiyang 550025, China

### S1. The structure of HEAs

The disordered structures for the examined alloys were created using SQS code by optimization of pair correlation functions up to third neighbor shell. The details of the SQS cells are list in Table S1.

**Table S1.** The unrelaxed SQS lattices for the examined alloys

| FeCrCoNi        |         |         |    | NbMoTaW         |       |       |    | FeCuCrMnMo      |         |         |    |
|-----------------|---------|---------|----|-----------------|-------|-------|----|-----------------|---------|---------|----|
| 108-atom FCC    |         |         |    | 128-atom BCC    |       |       |    | 90-atom BCC     |         |         |    |
| Lattice vectors |         |         |    | Lattice vectors |       |       |    | Lattice vectors |         |         |    |
| 10.72           | 0       | 0       |    | 12.9            | 0     | 0     |    | 14.6            | 0       | 0       |    |
| 0               | 10.72   | 0       |    | 0               | 12.9  | 0     |    | 0               | 8.76    | 0       |    |
| 0               | 0       | 10.72   |    | 0               | 0     | 12.9  |    | 0               | 0       | 8.76    |    |
| Atomic position |         |         |    | Atomic position |       |       |    | Atomic position |         |         |    |
| 0               | 0       | 0       | Ni | 0               | 0     | 0     | Nb | 0               | 0       | 0       | Cu |
| 0.83333         | 0.83333 | 0       | Ni | 0               | 0     | 0.75  | Nb | 0.1             | 0.16667 | 0.83333 | Cu |
| 0               | 0.83333 | 0.5     | Ni | 0.875           | 0.875 | 0.625 | Nb | 0               | 0.33333 | 0.66667 | Cu |
| 0               | 0       | 0.33333 | Ni | 0.875           | 0.875 | 0.375 | Nb | 0.1             | 0.16667 | 0.16667 | Cu |
| 0               | 0.83333 | 0.16667 | Ni | 0.875           | 0.875 | 0.125 | Nb | 0.4             | 0       | 0       | Cu |
| 0.83333         | 0.66667 | 0.83333 | Ni | 0               | 0.75  | 0.25  | Nb | 0.4             | 0.66667 | 0       | Cu |
| 0               | 0.66667 | 0.33333 | Ni | 0               | 0.5   | 0.25  | Nb | 0.5             | 0.5     | 0.5     | Cu |
| 0               | 0.5     | 0.16667 | Ni | 0.875           | 0.125 | 0.875 | Nb | 0.4             | 0.66667 | 0.33333 | Cu |
| 0.83333         | 0.33333 | 0.5     | Ni | 0.625           | 0.875 | 0.625 | Nb | 0.5             | 0.16667 | 0.83333 | Cu |
| 0.66667         | 0       | 0       | Ni | 0.75            | 0     | 0.25  | Nb | 0.5             | 0.16667 | 0.16667 | Cu |

\* Corresponding authors. E-mail: [yxwang@fudan.edu.cn](mailto:yxwang@fudan.edu.cn)

|         |         |         |    |       |       |       |    |     |         |         |    |
|---------|---------|---------|----|-------|-------|-------|----|-----|---------|---------|----|
| 0.66667 | 0       | 0.33333 | Ni | 0.75  | 0.75  | 0.75  | Nb | 0.6 | 0       | 0.33333 | Cu |
| 0.5     | 0       | 0.16667 | Ni | 0.75  | 0.5   | 0     | Nb | 0.7 | 0.5     | 0.16667 | Cu |
| 0.5     | 0.5     | 0       | Ni | 0.75  | 0.5   | 0.5   | Nb | 0.6 | 0.33333 | 0       | Cu |
| 0.66667 | 0.66667 | 0.66667 | Ni | 0.625 | 0.375 | 0.375 | Nb | 0.9 | 0.83333 | 0.16667 | Cu |
| 0.5     | 0.66667 | 0.16667 | Ni | 0.75  | 0.5   | 0.25  | Nb | 0.8 | 0.66667 | 0       | Cu |
| 0.66667 | 0.33333 | 0       | Ni | 0.75  | 0.25  | 0     | Nb | 0.9 | 0.5     | 0.16667 | Cu |
| 0.5     | 0.33333 | 0.16667 | Ni | 0.625 | 0.125 | 0.875 | Nb | 0.8 | 0.33333 | 0.66667 | Cu |
| 0.66667 | 0.16667 | 0.16667 | Ni | 0.625 | 0.125 | 0.125 | Nb | 0.9 | 0.16667 | 0.16667 | Cu |
| 0.16667 | 0       | 0.83333 | Ni | 0.5   | 0     | 0     | Nb | 0.1 | 0.83333 | 0.83333 | Cr |
| 0.33333 | 0.83333 | 0.83333 | Ni | 0.5   | 0     | 0.25  | Nb | 0   | 0       | 0.33333 | Cr |
| 0.16667 | 0.5     | 0       | Ni | 0.375 | 0.875 | 0.125 | Nb | 0.2 | 0       | 0       | Cr |
| 0.16667 | 0.66667 | 0.83333 | Ni | 0.375 | 0.625 | 0.625 | Nb | 0.2 | 0.66667 | 0.66667 | Cr |
| 0.33333 | 0.5     | 0.5     | Ni | 0.5   | 0.5   | 0     | Nb | 0.3 | 0.5     | 0.5     | Cr |
| 0.16667 | 0.5     | 0.33333 | Ni | 0.375 | 0.375 | 0.875 | Nb | 0.2 | 0.66667 | 0.33333 | Cr |
| 0.33333 | 0.5     | 0.16667 | Ni | 0.5   | 0.5   | 0.75  | Nb | 0.2 | 0.33333 | 0.66667 | Cr |
| 0.33333 | 0.16667 | 0.83333 | Ni | 0.375 | 0.375 | 0.625 | Nb | 0.2 | 0.33333 | 0.33333 | Cr |
| 0.33333 | 0.33333 | 0.33333 | Ni | 0.5   | 0.5   | 0.25  | Nb | 0.4 | 0.33333 | 0.33333 | Cr |
| 0.83333 | 0       | 0.83333 | Cr | 0.375 | 0.125 | 0.875 | Nb | 0.6 | 0       | 0       | Cr |
| 0.83333 | 0.83333 | 0.66667 | Cr | 0.5   | 0.25  | 0.5   | Nb | 0.6 | 0.66667 | 0       | Cr |
| 0.83333 | 0       | 0.5     | Cr | 0.5   | 0.25  | 0.25  | Nb | 0.7 | 0.16667 | 0.83333 | Cr |
| 0.83333 | 0.83333 | 0.33333 | Cr | 0.125 | 0.625 | 0.875 | Nb | 0.7 | 0.16667 | 0.5     | Cr |
| 0       | 0.5     | 0.83333 | Cr | 0.125 | 0.375 | 0.375 | Nb | 0.8 | 0       | 0.33333 | Cr |
| 0.83333 | 0.5     | 0.66667 | Cr | 0.875 | 0.875 | 0.875 | Mo | 0.9 | 0.5     | 0.83333 | Cr |
| 0       | 0.5     | 0.5     | Cr | 0     | 0     | 0.25  | Mo | 0.8 | 0.66667 | 0.66667 | Cr |
| 0.83333 | 0.5     | 0.33333 | Cr | 0     | 0.75  | 0     | Mo | 0.9 | 0.16667 | 0.5     | Cr |
| 0       | 0.33333 | 0       | Cr | 0     | 0.75  | 0.5   | Mo | 0.8 | 0.33333 | 0.33333 | Cr |
| 0.83333 | 0.16667 | 0.33333 | Cr | 0.875 | 0.375 | 0.625 | Mo | 0   | 0       | 0.66667 | Fe |
| 0.66667 | 0       | 0.66667 | Cr | 0     | 0.25  | 0     | Mo | 0.1 | 0.83333 | 0.5     | Fe |
| 0.5     | 0.83333 | 0.66667 | Cr | 0     | 0.25  | 0.5   | Mo | 0.1 | 0.5     | 0.83333 | Fe |
| 0.66667 | 0.83333 | 0.5     | Cr | 0.875 | 0.125 | 0.375 | Mo | 0   | 0.66667 | 0.33333 | Fe |
| 0.66667 | 0.83333 | 0.16667 | Cr | 0     | 0.25  | 0.25  | Mo | 0.1 | 0.5     | 0.16667 | Fe |
| 0.5     | 0.66667 | 0.83333 | Cr | 0.75  | 0     | 0     | Mo | 0   | 0.33333 | 0       | Fe |
| 0.66667 | 0.5     | 0.83333 | Cr | 0.75  | 0.75  | 0     | Mo | 0.1 | 0.16667 | 0.5     | Fe |
| 0.5     | 0.5     | 0.66667 | Cr | 0.625 | 0.625 | 0.875 | Mo | 0.3 | 0.83333 | 0.83333 | Fe |
| 0.66667 | 0.33333 | 0.66667 | Cr | 0.75  | 0.75  | 0.5   | Mo | 0.2 | 0       | 0.66667 | Fe |
| 0.5     | 0.16667 | 0.66667 | Cr | 0.625 | 0.625 | 0.375 | Mo | 0.2 | 0.66667 | 0       | Fe |
| 0.16667 | 0.83333 | 0       | Cr | 0.625 | 0.375 | 0.875 | Mo | 0.3 | 0.16667 | 0.5     | Fe |
| 0.16667 | 0.83333 | 0.33333 | Cr | 0.75  | 0.5   | 0.75  | Mo | 0.3 | 0.16667 | 0.16667 | Fe |
| 0.33333 | 0.5     | 0.83333 | Cr | 0.625 | 0.375 | 0.125 | Mo | 0.5 | 0.83333 | 0.83333 | Fe |
| 0.16667 | 0.66667 | 0.5     | Cr | 0.375 | 0.875 | 0.625 | Mo | 0.5 | 0.83333 | 0.5     | Fe |
| 0.16667 | 0.66667 | 0.16667 | Cr | 0.375 | 0.625 | 0.875 | Mo | 0.6 | 0.66667 | 0.33333 | Fe |
| 0.33333 | 0.33333 | 0       | Cr | 0.5   | 0.75  | 0.75  | Mo | 0.6 | 0.33333 | 0.33333 | Fe |
| 0.16667 | 0.33333 | 0.83333 | Cr | 0.5   | 0.75  | 0.5   | Mo | 0.7 | 0.16667 | 0.16667 | Fe |
| 0.33333 | 0.16667 | 0.5     | Cr | 0.5   | 0.5   | 0.5   | Mo | 0.8 | 0.66667 | 0.33333 | Fe |
| 0       | 0.83333 | 0.83333 | Fe | 0.375 | 0.125 | 0.125 | Mo | 0.1 | 0.83333 | 0.16667 | Mo |
| 0       | 0       | 0.66667 | Fe | 0.25  | 0     | 0     | Mo | 0   | 0.66667 | 0.66667 | Mo |
| 0       | 0.66667 | 0       | Fe | 0.25  | 0     | 0.5   | Mo | 0   | 0.33333 | 0.33333 | Mo |
| 0.83333 | 0.5     | 0       | Fe | 0.125 | 0.625 | 0.625 | Mo | 0.3 | 0.83333 | 0.16667 | Mo |
| 0.83333 | 0.66667 | 0.16667 | Fe | 0.25  | 0.5   | 0     | Mo | 0.3 | 0.5     | 0.83333 | Mo |
| 0       | 0.33333 | 0.66667 | Fe | 0.25  | 0.5   | 0.75  | Mo | 0.3 | 0.5     | 0.16667 | Mo |
| 0.83333 | 0.16667 | 0.66667 | Fe | 0.25  | 0.5   | 0.25  | Mo | 0.2 | 0.33333 | 0       | Mo |
| 0       | 0.33333 | 0.33333 | Fe | 0.25  | 0.25  | 0     | Mo | 0.4 | 0       | 0.66667 | Mo |
| 0       | 0.16667 | 0.16667 | Fe | 0.125 | 0.125 | 0.875 | Mo | 0.5 | 0.5     | 0.83333 | Mo |
| 0.5     | 0.83333 | 0       | Fe | 0.125 | 0.125 | 0.375 | Mo | 0.4 | 0.33333 | 0       | Mo |

|         |         |         |    |       |       |       |    |     |         |         |    |
|---------|---------|---------|----|-------|-------|-------|----|-----|---------|---------|----|
| 0.66667 | 0.83333 | 0.83333 | Fe | 0     | 0     | 0.5   | Ta | 0.5 | 0.16667 | 0.5     | Mo |
| 0.5     | 0.83333 | 0.33333 | Fe | 0     | 0.75  | 0.75  | Ta | 0.7 | 0.83333 | 0.5     | Mo |
| 0.66667 | 0.66667 | 0       | Fe | 0.875 | 0.625 | 0.625 | Ta | 0.7 | 0.5     | 0.83333 | Mo |
| 0.66667 | 0.5     | 0.5     | Fe | 0.875 | 0.625 | 0.375 | Ta | 0.7 | 0.5     | 0.5     | Mo |
| 0.66667 | 0.33333 | 0.33333 | Fe | 0.875 | 0.375 | 0.875 | Ta | 0.6 | 0.33333 | 0.66667 | Mo |
| 0.33333 | 0       | 0.66667 | Fe | 0     | 0.5   | 0.5   | Ta | 0.9 | 0.83333 | 0.5     | Mo |
| 0.16667 | 0       | 0.5     | Fe | 0.875 | 0.125 | 0.125 | Ta | 0.9 | 0.5     | 0.5     | Mo |
| 0.33333 | 0.83333 | 0.5     | Fe | 0.75  | 0     | 0.75  | Ta | 0.8 | 0.33333 | 0       | Mo |
| 0.16667 | 0       | 0.16667 | Fe | 0.75  | 0     | 0.5   | Ta | 0   | 0.66667 | 0       | Mn |
| 0.33333 | 0.66667 | 0       | Fe | 0.625 | 0.875 | 0.375 | Ta | 0.1 | 0.5     | 0.5     | Mn |
| 0.33333 | 0.66667 | 0.66667 | Fe | 0.625 | 0.875 | 0.125 | Ta | 0.3 | 0.83333 | 0.5     | Mn |
| 0.16667 | 0.5     | 0.66667 | Fe | 0.625 | 0.625 | 0.625 | Ta | 0.2 | 0       | 0.33333 | Mn |
| 0.33333 | 0.66667 | 0.33333 | Fe | 0.625 | 0.125 | 0.625 | Ta | 0.3 | 0.16667 | 0.83333 | Mn |
| 0.16667 | 0.16667 | 0       | Fe | 0.75  | 0.25  | 0.5   | Ta | 0.4 | 0       | 0.33333 | Mn |
| 0.16667 | 0.16667 | 0.66667 | Fe | 0.625 | 0.125 | 0.375 | Ta | 0.5 | 0.83333 | 0.16667 | Mn |
| 0.16667 | 0.16667 | 0.33333 | Fe | 0.75  | 0.25  | 0.25  | Ta | 0.4 | 0.66667 | 0.66667 | Mn |
| 0.16667 | 0.33333 | 0.16667 | Fe | 0.375 | 0.875 | 0.875 | Ta | 0.5 | 0.5     | 0.16667 | Mn |
| 0.83333 | 0       | 0.16667 | Co | 0.5   | 0     | 0.75  | Ta | 0.4 | 0.33333 | 0.66667 | Mn |
| 0       | 0.66667 | 0.66667 | Co | 0.5   | 0     | 0.5   | Ta | 0.7 | 0.83333 | 0.83333 | Mn |
| 0.83333 | 0.66667 | 0.5     | Co | 0.375 | 0.875 | 0.375 | Ta | 0.6 | 0       | 0.66667 | Mn |
| 0.83333 | 0.16667 | 0       | Co | 0.375 | 0.625 | 0.125 | Ta | 0.7 | 0.83333 | 0.16667 | Mn |
| 0.83333 | 0.33333 | 0.83333 | Co | 0.5   | 0.25  | 0.75  | Ta | 0.6 | 0.66667 | 0.66667 | Mn |
| 0       | 0.16667 | 0.83333 | Co | 0.375 | 0.125 | 0.625 | Ta | 0.8 | 0       | 0       | Mn |
| 0       | 0.16667 | 0.5     | Co | 0.125 | 0.875 | 0.375 | Ta | 0.9 | 0.83333 | 0.83333 | Mn |
| 0.83333 | 0.33333 | 0.16667 | Co | 0.25  | 0     | 0.25  | Ta | 0.8 | 0       | 0.66667 | Mn |
| 0.5     | 0       | 0.83333 | Co | 0.25  | 0.75  | 0     | Ta | 0.9 | 0.16667 | 0.83333 | Mn |
| 0.5     | 0       | 0.5     | Co | 0.125 | 0.625 | 0.125 | Ta |     |         |         |    |
| 0.5     | 0.66667 | 0.5     | Co | 0.125 | 0.375 | 0.875 | Ta |     |         |         |    |
| 0.66667 | 0.66667 | 0.33333 | Co | 0.125 | 0.375 | 0.625 | Ta |     |         |         |    |
| 0.5     | 0.5     | 0.33333 | Co | 0.25  | 0.5   | 0.5   | Ta |     |         |         |    |
| 0.66667 | 0.5     | 0.16667 | Co | 0.25  | 0.25  | 0.5   | Ta |     |         |         |    |
| 0.5     | 0.16667 | 0       | Co | 0.125 | 0.125 | 0.125 | Ta |     |         |         |    |
| 0.5     | 0.33333 | 0.83333 | Co | 0.875 | 0.625 | 0.875 | W  |     |         |         |    |
| 0.66667 | 0.16667 | 0.83333 | Co | 0.875 | 0.625 | 0.125 | W  |     |         |         |    |
| 0.5     | 0.33333 | 0.5     | Co | 0     | 0.5   | 0     | W  |     |         |         |    |
| 0.66667 | 0.16667 | 0.5     | Co | 0     | 0.5   | 0.75  | W  |     |         |         |    |
| 0.5     | 0.16667 | 0.33333 | Co | 0.875 | 0.375 | 0.375 | W  |     |         |         |    |
| 0.33333 | 0       | 0       | Co | 0.875 | 0.375 | 0.125 | W  |     |         |         |    |
| 0.16667 | 0.83333 | 0.66667 | Co | 0     | 0.25  | 0.75  | W  |     |         |         |    |
| 0.33333 | 0       | 0.33333 | Co | 0.875 | 0.125 | 0.625 | W  |     |         |         |    |
| 0.33333 | 0.83333 | 0.16667 | Co | 0.625 | 0.875 | 0.875 | W  |     |         |         |    |
| 0.33333 | 0.33333 | 0.66667 | Co | 0.75  | 0.75  | 0.25  | W  |     |         |         |    |
| 0.16667 | 0.33333 | 0.5     | Co | 0.625 | 0.625 | 0.125 | W  |     |         |         |    |
| 0.33333 | 0.16667 | 0.16667 | Co | 0.625 | 0.375 | 0.625 | W  |     |         |         |    |
|         |         |         |    | 0.75  | 0.25  | 0.75  | W  |     |         |         |    |
|         |         |         |    | 0.5   | 0.75  | 0     | W  |     |         |         |    |
|         |         |         |    | 0.375 | 0.625 | 0.375 | W  |     |         |         |    |
|         |         |         |    | 0.5   | 0.75  | 0.25  | W  |     |         |         |    |
|         |         |         |    | 0.375 | 0.375 | 0.375 | W  |     |         |         |    |
|         |         |         |    | 0.375 | 0.375 | 0.125 | W  |     |         |         |    |
|         |         |         |    | 0.5   | 0.25  | 0     | W  |     |         |         |    |
|         |         |         |    | 0.375 | 0.125 | 0.375 | W  |     |         |         |    |
|         |         |         |    | 0.125 | 0.875 | 0.875 | W  |     |         |         |    |
|         |         |         |    | 0.25  | 0     | 0.75  | W  |     |         |         |    |

|       |       |       |   |
|-------|-------|-------|---|
| 0.125 | 0.875 | 0.625 | W |
| 0.125 | 0.875 | 0.125 | W |
| 0.25  | 0.75  | 0.75  | W |
| 0.25  | 0.75  | 0.5   | W |
| 0.125 | 0.625 | 0.375 | W |
| 0.25  | 0.75  | 0.25  | W |
| 0.125 | 0.375 | 0.125 | W |
| 0.25  | 0.25  | 0.75  | W |
| 0.125 | 0.125 | 0.625 | W |
| 0.25  | 0.25  | 0.25  | W |

**Table S2.** Pair correction functions  $\Pi_{2,n}$  (n up to the 3th nearest neighbor) for the random structures of the three HEAs.

| Structure                | $\Pi_{2,1}$ | $\Pi_{2,2}$ | $\Pi_{2,3}$ |
|--------------------------|-------------|-------------|-------------|
| 108-atom FCC (FeCrCoNi)  | 1/648       | 0           | 1/32        |
| 128-atom BCC (NbMoTaW)   | 0           | 5/101       | 1/50        |
| 90-atom BCC (FeCuCrMnMo) | 1/26        | 25/818      | 1/165       |

**Table S3.** Order parameter for each atomic pair in the examined alloys.

| FeCrCoNi |         | NbMoTaW |       | FeCuCrMnMo |         |
|----------|---------|---------|-------|------------|---------|
| Pair     | Order   | Pair    | Order | Pair       | Order   |
| FeFe     | 0.0123  | NbNb    | 0.0   | FeFe       | -0.0417 |
| FeCr     | 0.0     | NbMo    | 0.0   | FeCu       | 0.0278  |
| FeCo     | 0.0     | NbTa    | 0.0   | FeCr       | 0.0278  |
| FeNi     | -0.0123 | NbW     | 0.0   | FeMn       | -0.0069 |
| CrCr     | 0.0123  | MoMo    | 0.0   | FeMo       | -0.0069 |
| CrCo     | 0.0     | MoTa    | 0.0   | CuCu       | -0.0417 |
| CrNi     | -0.0123 | MoW     | 0.0   | CuCr       | -0.0069 |
| CoCo     | -0.0123 | TaTa    | 0.0   | CuMn       | 0.0278  |
| CoNi     | 0.0123  | TaW     | 0.0   | CuMo       | -0.0069 |
| NiNi     | 0.0123  | WW      | 0.0   | CrCr       | 0.0278  |
|          |         |         |       | CrMn       | -0.0069 |

|      |         |
|------|---------|
| CrMo | -0.0417 |
| MnMn | -0.0417 |
| MnMo | 0.0278  |
| MoMo | 0.0278  |

In our calculations, we paid more attention to the distribution of the first nearest neighbor atoms of the H-embedding interstitial polyhedron. Thus, the disordered distribution of the first neighbor shell is more critical. A Warren-Cowley order parameter was used to estimate the chemical ordering of atomic pairs in alloys,  $\alpha_{ij}^n = 1 - p_{ij}^n / x_j$ , where  $p_{ij}^n$  is the probability of finding an atom of  $j$  type around an atom of  $i$  type in the  $n$ -th neighboring shell (here, we chose  $n = 1$ ) and  $x_j$  is the atomic proportion of type  $j$ .  $\alpha_{ij} = 0$  corresponds a random state of  $i$ - $j$  atom pair.  $\alpha_{ij} > 0$  or  $\alpha < 0$  corresponds the poor or rich of  $i$ - $j$  atom pair, respectively. The order parameters of the atomic pairs in the three HEAs are listed in Table S3 with all of values less than 0.05, which indicates the good performance of random state of these SQS cells.

## S2. Solution energies (SEs) for H in pure metals

**Table S4.** Solution energies (eV) for H in pure metals. The solution energies for H in Ni were computed in its spin-polarized form [37]. Other metals were calculated in the nonmagnetic structures. Ni and  $\gamma$ -Fe [38] are FCC structures. Cr [34], Nb[36], Mo [34], Ta [36], W [35], and  $\alpha$ -Fe [30] are computed in BCC structures.

| Metals | Ni   | $\gamma$ -Fe | Cr   | Nb    | Mo   | Ta    | W    | $\alpha$ -Fe |
|--------|------|--------------|------|-------|------|-------|------|--------------|
| TIs    | 0.32 | 0.49         | 0.79 | -0.39 | 0.78 | -0.41 | 0.88 | 0.20         |
| OIs    | 0.07 | 0.04         | 0.92 | -0.10 | 1.03 | -0.08 | 1.26 | 0.33         |

### S3. Correlation between SE and the coordination environment of H atom

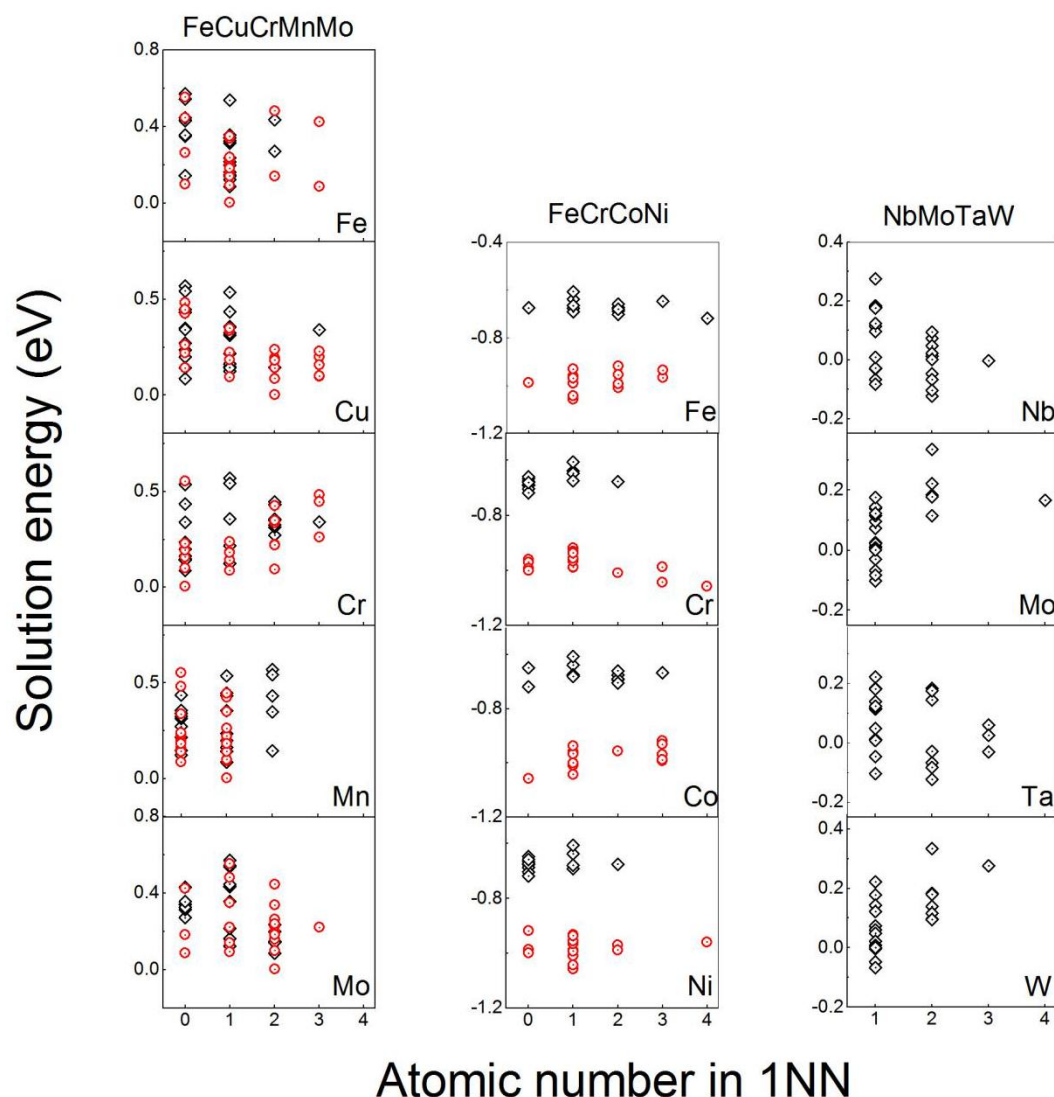

**Fig. S1.** Dependence of solute energies on the atomic types in the first nearest neighbor shell (1NN). The number of different metal atoms in the first nearest neighbor shell for each solute H atom was counted. From Fig. S1, little correlation has been found out. For instance, in FeCuCrMnMo, the variation of solute energy with the coordinated Cr atoms is non-obvious. The maximum (minimum) value of solute energy coordinated by one Cr atom is larger (smaller) than those values coordinated by multi-atom Cr. Similar phenomenon occurs in previous studies, which is attributed to the inherent chemical complexity in the HEAs. For this reason, we focused on another factors, such as the volume of interstitial polyhedron, to elaborate the mechanism of effect on the solute energy.
